# Supplementary figures and images for: Characterizing pancreatic β-cell heterogeneity in the streptozotocin model by single-cell transcriptomic analysis
Source: PubMed Central journal article supplement — Mol Metab. 2020 Apr 2;37:100982. doi: 10.1016/j.molmet.2020.100982 (PMC7184252; doi:10.1016/j.molmet.2020.100982), 2020-04-02

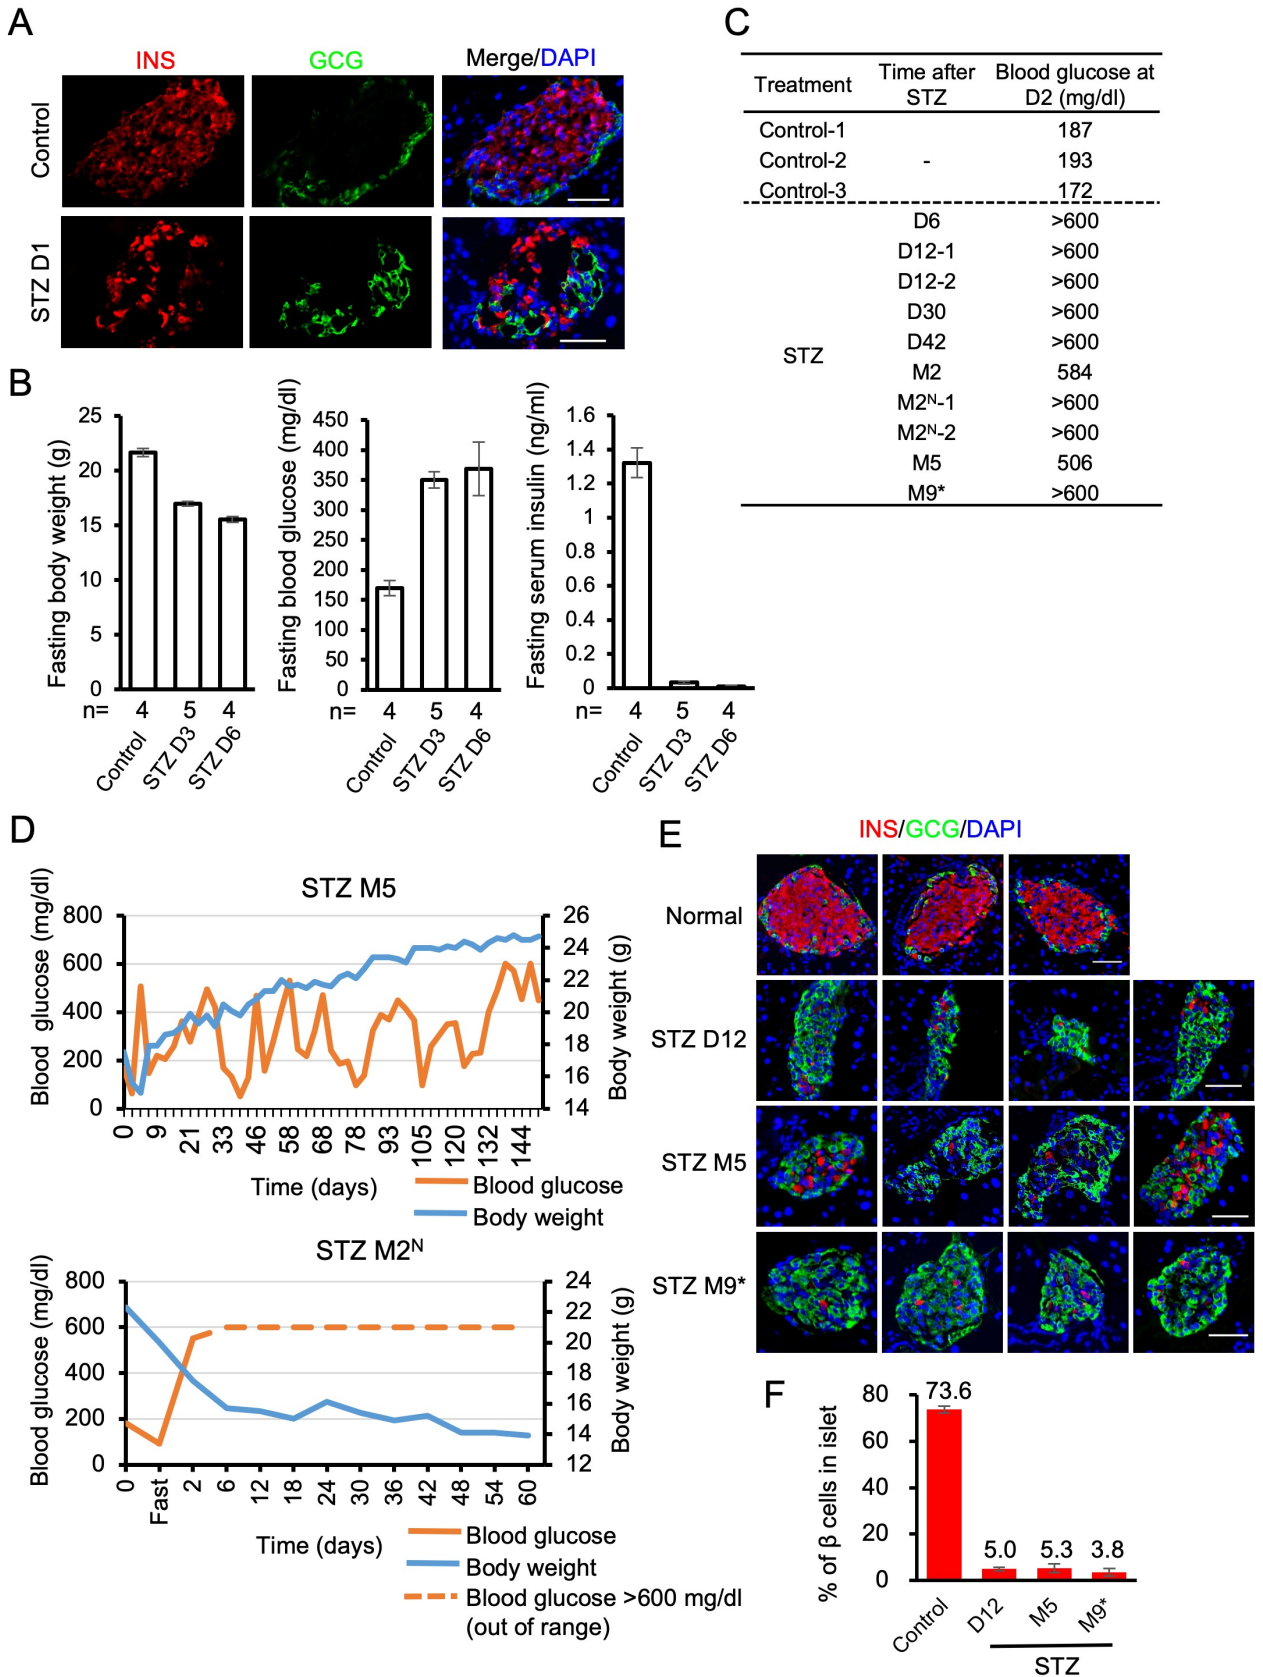

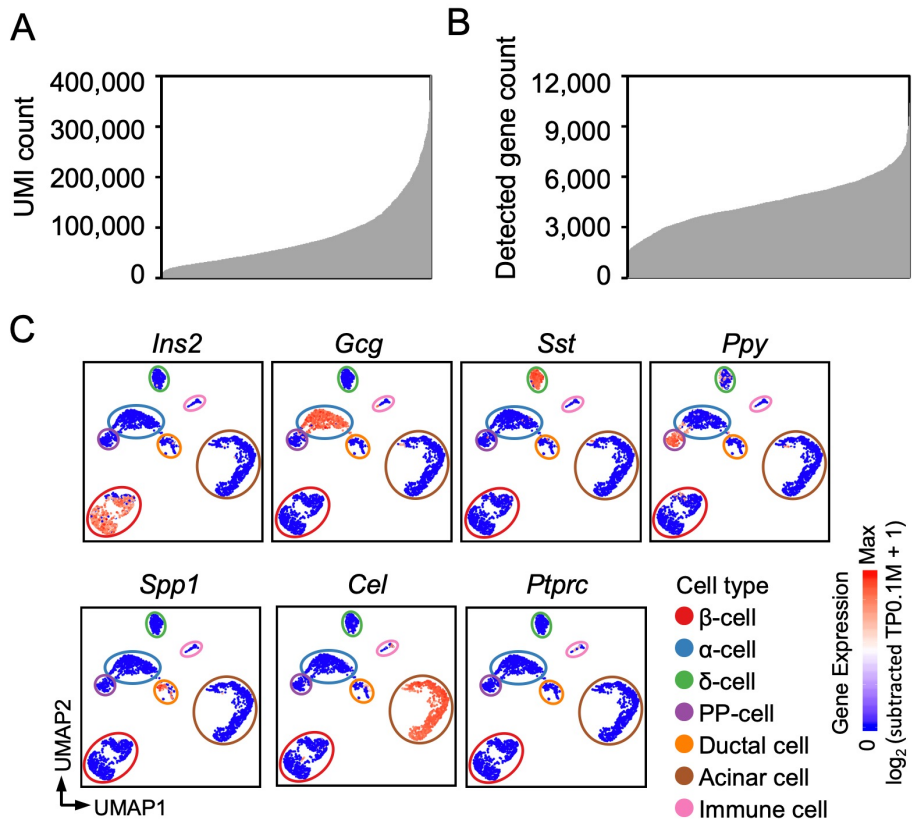

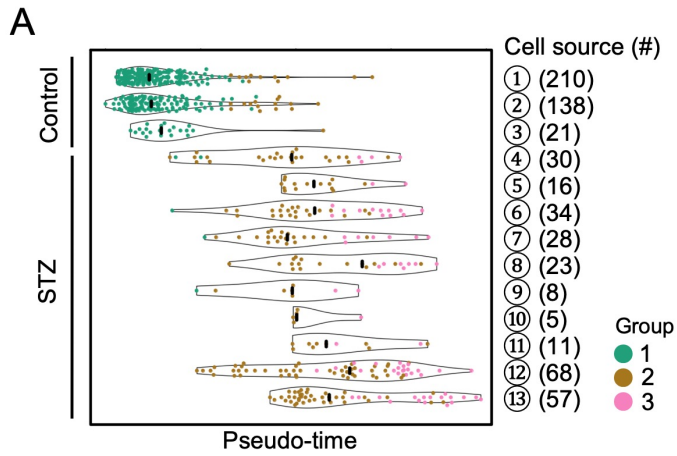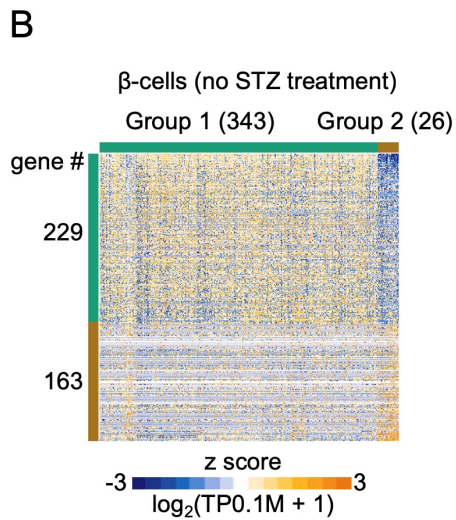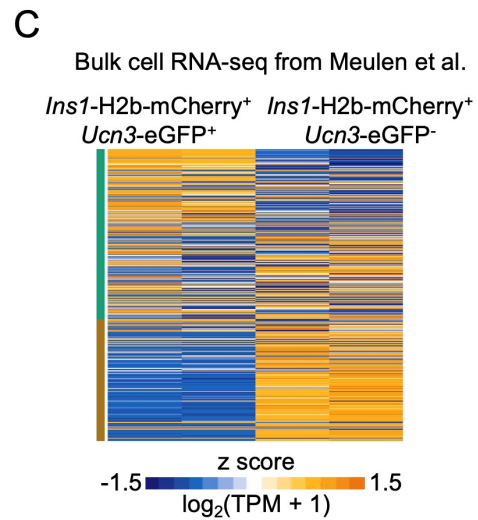

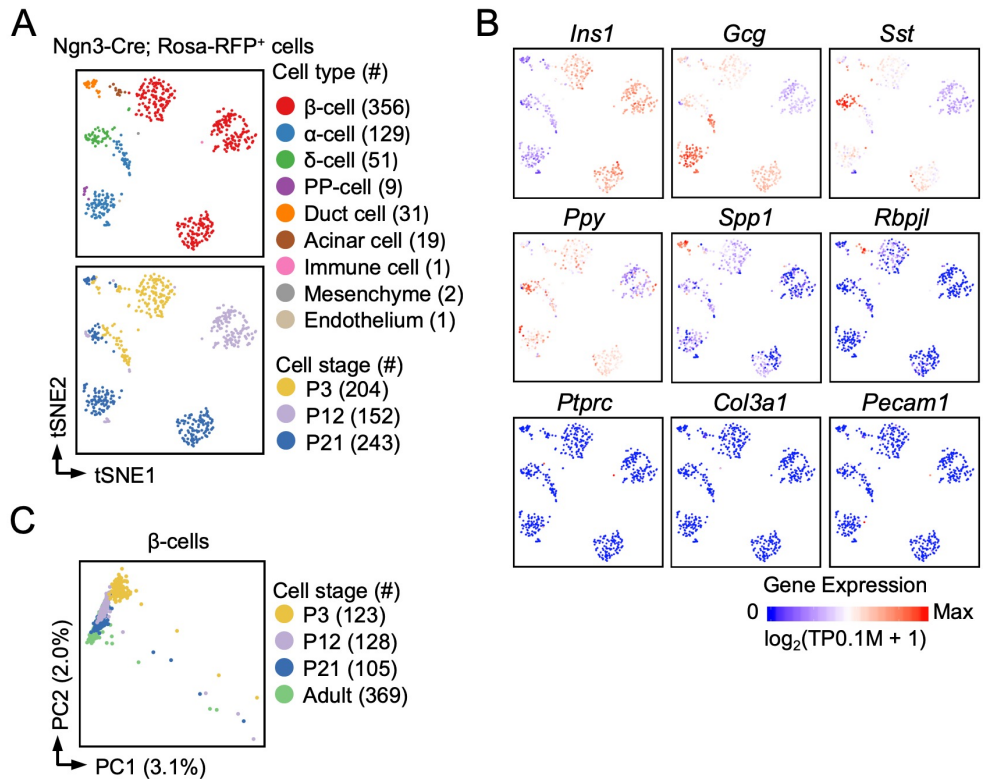

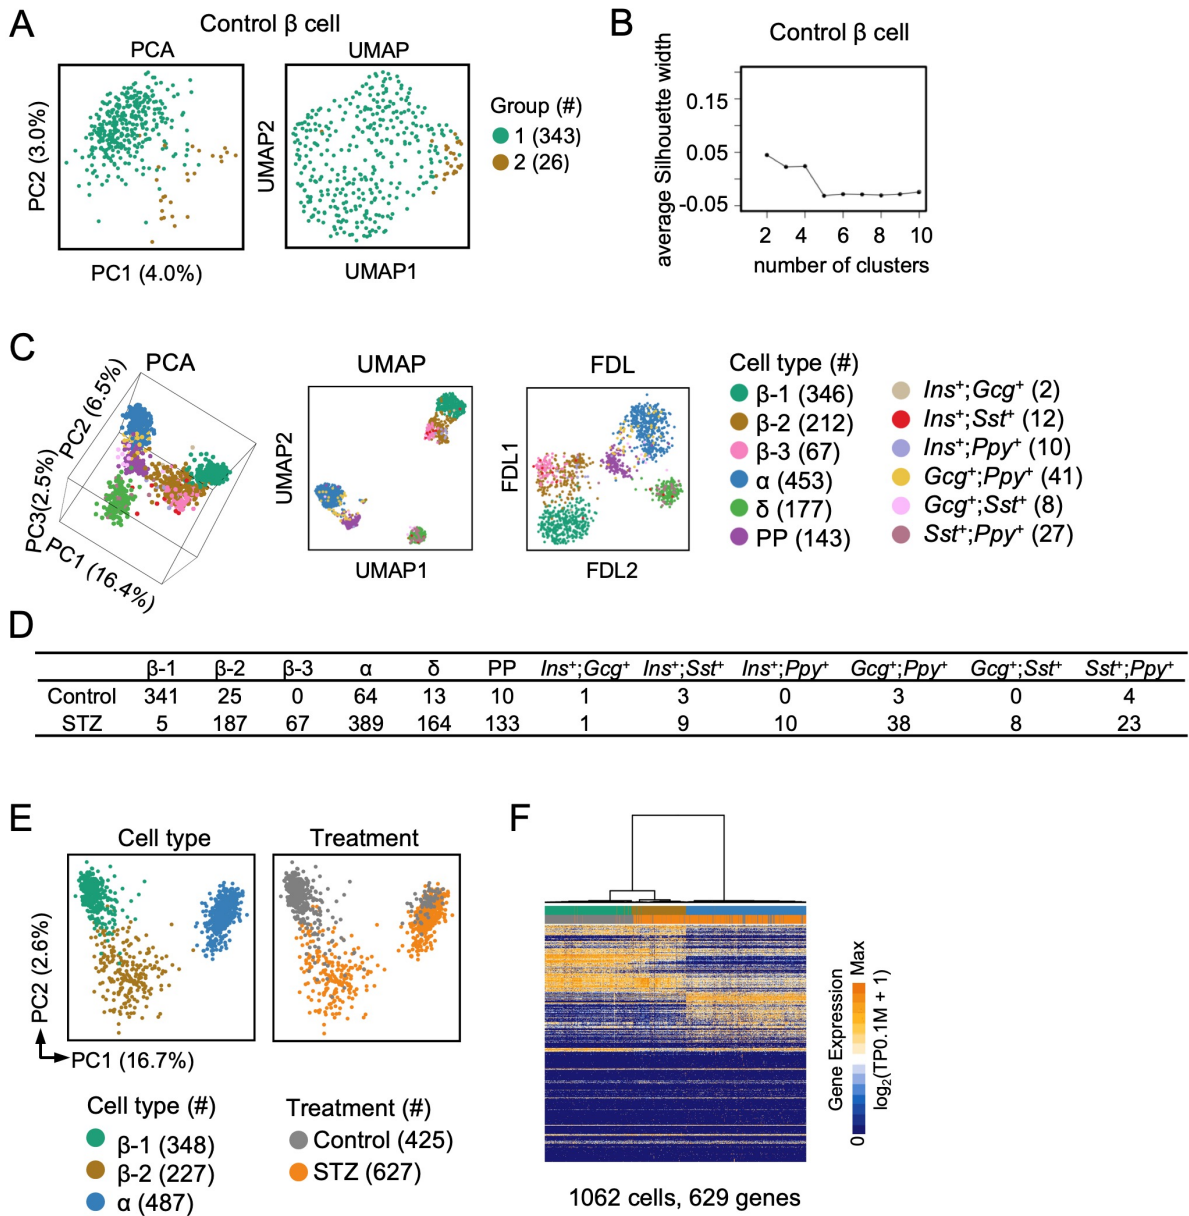

Supplement: mmc7.pdf [file mmc7.pdf]
